# Supplementary material
Source: MDPI journal article supplement (https://www.mdpi.com/2075-4442/11/2/65)
Supplement: s1 [file s1 › lubricants-2201381-supplementary.pdf]

## Supplementary Information

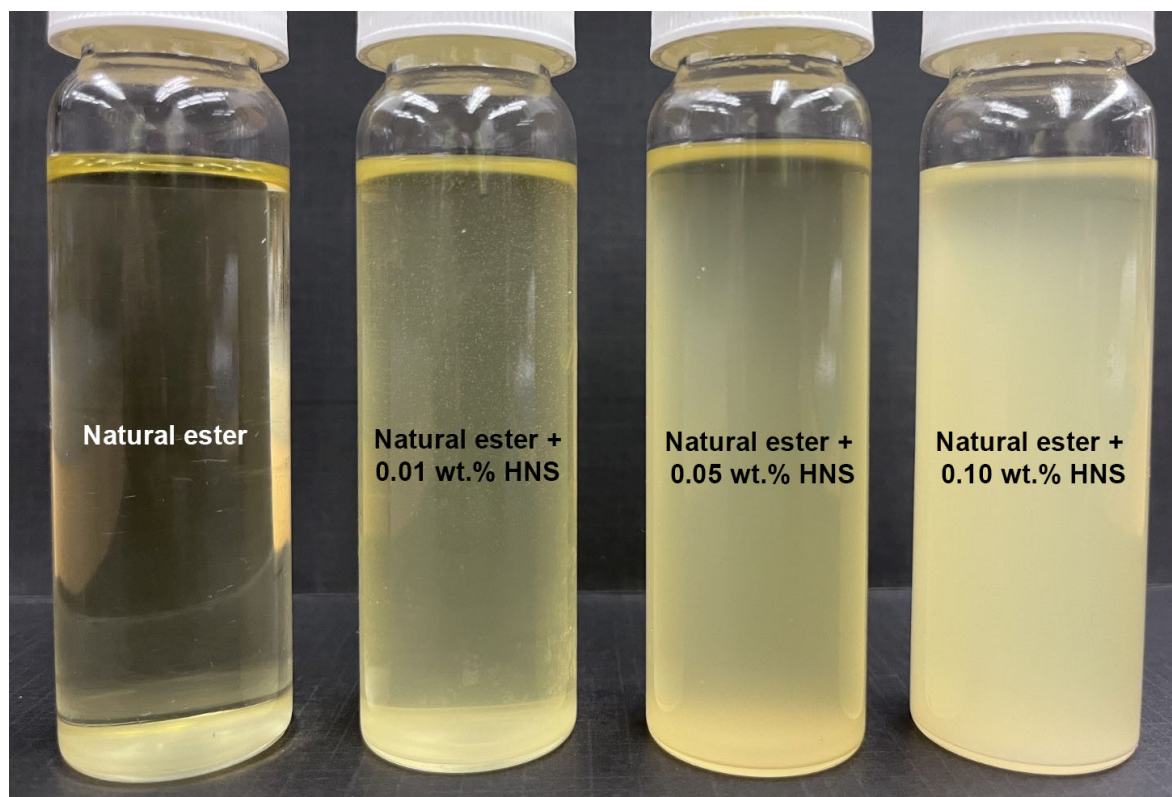

**Figure S1.** Observation of nanostructure's sedimentation after 15 days on the shelf.
